# HPV-6 Molecular Variants Association With the Development of Genital Warts in Men: The HIM Study

Emilia Flores-Díaz,<sup>1,a</sup> Karen A. Sereday,<sup>2</sup> Silvaneide Ferreira,<sup>1</sup> Bradley Sirak,<sup>2</sup> João Simão Sobrinho,<sup>1</sup> Maria Luiza Baggio,<sup>1</sup> Lenice Galan,<sup>3</sup> Roberto C. Silva,<sup>4</sup> Eduardo Lazcano-Ponce,<sup>5</sup> Anna R. Giuliano,<sup>2</sup> Luisa L. Villa,<sup>1,6</sup> and Laura Sichero<sup>1</sup>, for the HIM Study group

<sup>1</sup>Molecular Biology Laboratory, Center for Translational Research in Oncology, Instituto do Câncer do Estado de São Paulo, Hospital das Clínicas da Faculdade de Medicina da Universidade de São Paulo, Brazil; <sup>2</sup>Department of Cancer Epidemiology, H. Lee Moffitt Cancer Center and Research Institute, Tampa, Florida; <sup>3</sup>Ludwig Institute for Cancer Research, São Paulo Branch, and <sup>4</sup>Centro de Referência e Treinamento DST/Aids, São Paulo, Brazil; <sup>5</sup>Centro de Investigación en Salud Poblacional, Instituto Nacional de Salud Pública, Cuernavaca, Mexico; and <sup>6</sup>Department of Radiology and Oncology, Faculdade de Medicina, Universidade de São Paulo, Brazil

**Background.** Human papillomavirus type 6 (HPV-6) and HPV-11 are the etiological agents of approximately 90% of genital warts (GWs). The impact of HPV-6 genetic heterogeneity on persistence and progression to GWs remains undetermined.

**Methods.** HPV Infection in Men (HIM) Study participants who had HPV-6 genital swabs and/or GWs preceded by a viable normal genital swab were analyzed. Variants characterization was performed by polymerase chain reaction sequencing and samples classified within lineages (A, B) and sublineages (B1, B2, B3, B4, B5). Country- and age-specific analyses were conducted for individual variants; odds ratios and 95% confidence intervals for the risk of GWs according to HPV-6 variants were calculated.

**Results.** B3 variants were most prevalent. HPV-6 variants distribution differed between countries and case status. HPV-6 B1 variants prevalence was increased in GWs and genital swabs of cases compared to controls. There was difference in B1 and B3 variants detection in GW and the preceding genital swab. We observed significant association of HPV-6 B1 variants detection with GW development.

**Conclusions.** HPV-6 B1 variants are more prevalent in genital swabs that precede GW development, and confer an increased risk for GW. Further research is warranted to understand the possible involvement of B1 variants in the progression to clinically relevant lesions.

**Keywords.** HPV-6; variability; genital warts; males; HIM Study; prevalence.

Worldwide, condylomata acuminata (or genital warts [GWs]) are a very common sexually transmitted disease affecting both men and women. Despite their benign nature, GWs are associated with significant morbidity and personal emotional distress [1]. Although about one-third of GWs naturally regress, recurrence frequently occurs and, therefore, repeated treatment represents high medical costs [2]. Low-risk human papillomavirus type 6 (HPV-6) and HPV-11, frequently detected in the anogenital region of both genders, are the etiologic agents of over 90% of GWs [3]. Additionally, HPV-6 and HPV-11 are associated with the development of laryngeal papillomas [4]. These facts warranted the inclusion of both viral types in the quadrivalent HPV vaccine along with high-risk HPV-16 and HPV-18 [5]. Currently, after more than 5 years of high coverage vaccination,

a robust reduction in GWs burden is observed among young women in Australia [6].

The prototype HPV-6b clone was initially isolated from a condyloma acuminatum specimen [7] with differences in restriction patterns observed thereafter for HPV-6a and HPV-6vc nonprototypic genomes [8]. Furthermore, a full genome phylogenetic analysis of globally collected HPV-6 isolates revealed the existence of 2 deeply separated variant lineages (named A and B), with the B lineage consisting of 5 sublineages (B1–B5) [9, 10]. Where the HPV-6b-prototype sequence is clustered within lineage A, HPV-6vc and HPV-6a genomes sort into B1 and B3 sublineages, respectively [9].

In the last decade, a growing number of studies have explored the distribution of HPV-6 variants in lesions from different anatomic sites. These reports revealed that, aside from the Asian continent, lineage B variants, mainly from sublineage B1, predominate globally in HPV-6–positive samples from the anogenital region [10–12]. It has also been described that the simultaneous occurrence of 2 or more GWs within the same individual results from infection with a single HPV-6 genomic variant [13]. Interestingly, it has also been shown that in comparison to males, females have higher odds for infection with genetic variants from HPV-6 sublineage B3 than with variants from HPV-6 lineage A [10]. Nevertheless, clinical correlations for HPV-6 variants still deserve extensive analysis [14–16]. An

Received 21 October 2016; editorial decision 23 November 2016; accepted 1 December 2016; published online December 23, 2016.

<sup>a</sup>Present affiliation/address: Institute for Research in Immunology and Cancer (IRIC), and Molecular Biology Program, Faculty of Medicine, Université de Montréal, P.O. Box 6128, Downtown Station, Montréal, Québec H3C 3J7, Canada.

Correspondence: L. Sichero, PhD, Center for Translational Research in Oncology, Institute of Cancer of São Paulo, Ave Dr Arnaldo, 251, 8 andar, Cerqueira César, São Paulo, Brazil 01246-000 (laura.sichero@hc.fm.usp.br).

The Journal of Infectious Diseases® 2017;215:559–65

© The Author 2016. Published by Oxford University Press for the Infectious Diseases Society of America. All rights reserved. For permissions, e-mail: journals.permissions@oup.com. DOI: 10.1093/infdis/jiw600

important implication arising from this is how HPV-6 genomic heterogeneity impacts on transmission, persistence, and progression to GWs. Unraveling these issues could explain why some HPV-6 infections progress to GWs, while others do not. Here, we address this fundamental question within the multinational HPV Infection in Men (HIM) Study cohort. The aim of our study was to estimate HPV-6 variant prevalence in genital swabs from the healthy skin and in GWs biopsies, and to analyze lineage-specific persistence and infection progression to GWs in otherwise healthy men.

## METHODS

### Study Population

The HIM Study cohort includes over 4000 men aged 18–70 years, enrolled from July 2005 to June 2009, who were residents of São Paulo, São Paulo, Brazil; Cuernavaca, Morelos, Mexico; and Tampa, Florida. Details of the HIM Study design and procedures are published elsewhere [17]. In 2009, a biopsy and pathology protocol was implemented, allowing for biopsy collection, pathological confirmation, and HPV genotyping of lesions [18]. The study was approved by the ethical review boards of the Institutional Review Boards at the University of South Florida (Tampa, FL), the Ludwig Institute for Cancer Research (São Paulo Branch, Brazil), the Centro de Referência e Treinamento em DST/Aids (São Paulo, Brazil), and the Instituto Nacional de Salud Pública (Cuernavaca, Mexico), and informed consent was obtained from all participants.

### DNA Extraction and HPV Testing

At each biannual visit, 3 different prewetted Dacron swabs were used to sample the external genitalia (coronal sulcus, glans penis, penile shaft) and scrotum of participants; these swabs were further combined to form a single sample [17]. DNA extraction was performed using the Qiagen Media kit (Qiagen, Venlo, The Netherlands), and HPV detection and typing was conducted using the Linear Array HPV Genotyping Test (Roche Molecular Diagnosis, CA) capable of identifying 37 HPV types classified as high risk (HR-HPV: 16, 18, 31, 33, 35, 39, 45, 51, 52, 56, 58, 59, 68) or low risk (LR-HPV: 6, 11, 26, 40, 42, 53, 54, 55, 61, 62, 64, 66, 67, 69, 70, 71, 72, 73, 81, 82, IS39, 83, 84, 89).

Additionally, participants underwent clinical examination by a trained clinician at each visit, under 3× light magnification, to detect external genital lesions (EGLs). Each time a lesion was observed, a tissue sample was obtained by shave excision. EGLs were categorized as condyloma, suggestive of condyloma (with several characteristics but not histopathologically defined as condyloma), penile intraepithelial neoplasia, or not HPV-related, according to criteria previously published [19]. Participants could also attend the clinic for an intervening visit whenever a suspicious lesion was present; 66 of the 102 EGLs collected in this study were collected at these intermediate visits. DNA samples from formalin-fixed, paraffin-embedded

(FFPE) tissue biopsies were extracted using the QIAamp DNA FFPE Tissue kit (Qiagen), and HPV detection and genotyping was conducted using the INNO-LiPA HPV Genotyping Extra assay (Fujirebio, Göteborg, Sweden), which detects 28 viral types classified as high risk (HR-HPV: 16, 18, 31, 33, 35, 39, 45, 51, 52, 56, 58, 59, 68) or low risk (LR-HPV: 6, 11, 26, 40, 43, 44, 53, 54, 66, 69, 70, 71, 73, 74, 82). DNAs were considered adequate if tested positive for  $\beta$ -globin or any HPV type.

### HPV-6 Variant Characterization

HPV-6 variants were accessed by polymerase chain reaction (PCR) for amplification of a 617–base pair (bp) fragment within the *L2* gene (nucleotide positions 4430–5047) using AmpliTaq Gold DNA Polymerase (Applied Biosystems, CA). In specimens where no amplification was observed, additional sets of primers, that amplify smaller *L2* fragments, were used to cover the same 617-bp segment. Amplification products were submitted to automated sequencing in an ABI PRISM 3130XL GeneticAnalyzer/HITACHI sequencer (Applied Biosystems) using the BigDye Terminator v3.1 Cycle Sequencing kit (Applied Biosystems). DNA sequences were compared to the HPV-6 prototype (GenBank accession no. X00203) and classified into 2 lineages (A and B) and 5 sublineages (B1, B2, B3, B4, and B5) [9–10].

### Statistical Analysis

In the present study, controls met all of the following criteria: (1) had no HPV-6-associated EGLs categorized as condyloma or suggestive of condyloma (named from now on as GWs); (2) HIM participants for whom HPV-6 was detected in at least 1 normal genital skin swab at any study visit between April 2009–December 2013; (3) had at least another normal genital skin swab collected up to 640 days prior to the HPV-6-positive swab (the time period of 640 days [21 months] was selected a priori). Overall, 255 men qualified as controls for this analysis from whom 170 men were randomly selected from the 3 countries (approximately 67% available controls per country): Brazil (78/117), United States (47/71), and Mexico (45/67). Among the controls selected, 15 were excluded because no specimen remained for HPV-6-variant characterization (1 from Brazil; 9 from the United States; 5 from Mexico). For the remaining 155 controls, the most recently collected HPV-6 genital swab specimen underwent molecular variant characterization. Moreover, all HPV-6-positive smears collected in the previous 640 days were also submitted to variant characterization, up to a maximum of 3 specimens.

Cases were men with an incident HPV-6-positive GW, who had at least 1 (and up to 3) viable swabs from normal genital skin collected at a study visit up to 640 days preceding the day when the GW was obtained. The genital swab specimen collected at the visit just prior to the GW excision is referred to as “the most recent swab.” A total of 106 men had an HPV-6-positive

GW biopsied during the study, of whom 4 were excluded due to insufficient specimen for variant characterization. Cases were further subdivided into 2 groups: (1) participants harboring HPV-6 in both the GW and in a normal genital skin swab collected prior to lesion development ( $n = 70$ ); and (2) participants with a HPV-6-positive GW but otherwise negative in all normal genital skin swabs collected up to 640 days prior to EGL development ( $n = 28$ ).

Sociodemographic and sexual behavior characteristics were compared among cases and controls using the exact Pearson  $\chi^2$  test. Fisher exact test was used to compare HPV-6 variant distribution in normal genital skin swabs from controls and cases, and in GWs of cases by age and country. For these analyses, we assessed the most recent specimen from controls and cases. Fisher exact test was also used to study the association between HPV-6 variant detection in GWs and the preceding normal genital skin swabs.

Exact odds ratios (ORs) and 95% confidence intervals (CIs) were estimated for the risk of GW according to HPV-6 variant status in the most recent normal genital swab prior to lesion development. Given that the majority of variants detected on the most recent swabs of controls belonged to sublineage B3, this group was selected as the reference group. All analyses were conducted using SAS version 9.3 (SAS Institute, Cary, NC) and attained statistical significance at  $\alpha \leq .05$ .

## RESULTS

We were unable to characterize an HPV-6 variant in specimens from 4 controls and 4 cases due to PCR amplification failure. The majority of the remaining 151 controls and 98 cases were young men (<35 years), white, non-Hispanic, not circumcised, and reported to have never had sex with men. Additionally, most men have never smoked cigarettes and were currently not using any other tobacco products. No significant differences in sociodemographic and sexual behavior characteristics between cases and controls were observed (Table 1).

Table 2 shows the prevalence of the different HPV-6 variants in the most recent swab of normal genital skin obtained from controls, and prior to GW development among cases. Overall, within controls, HPV-6 B3 variants were the most prevalent in all 3 countries, although these variants were significantly higher in Mexico when compared with Brazil and the United States (80.0% Mexico, 60.8% Brazil, 48.7% United States;  $P = .006$ ). Interestingly, the prevalence of HPV-6 B1 variants in the most recent swab of cases was higher compared to controls. HPV-6 B3 variants were the most prevalent variants detected in cases and controls. However, the distribution of variants differed significantly by case status: we observed that cases were more likely to harbor B1 variants and less likely to harbor less common variants (lineage A and sublineages B2 and B5) on normal genital skin when compared to controls ( $P = .01$ ). Among

**Table 1. Differences in Sociodemographic and Sexual Behavior Characteristics Among HPV-6-Positive Men Who Did and Did Not Develop GWs During Follow-up in the HIM Study**

| Characteristic                       | Controls<br>(n = 151) |        | Cases<br>(n = 98) |        | P Value |
|--------------------------------------|-----------------------|--------|-------------------|--------|---------|
|                                      | n                     | (%)    | n                 | (%)    |         |
| Country                              | ...                   | ...    | ...               | ...    | .06     |
| United States                        | 37                    | (24.5) | 35                | (35.7) |         |
| Brazil                               | 74                    | (49.0) | 34                | (34.7) |         |
| Mexico                               | 40                    | (26.5) | 29                | (29.6) |         |
| Age                                  | ...                   | ...    | ...               | ...    | .69     |
| 18–24                                | 30                    | (19.9) | 20                | (20.4) |         |
| 25–34                                | 56                    | (37.1) | 41                | (41.8) |         |
| ≥35                                  | 65                    | (43.1) | 37                | (37.8) |         |
| Race                                 | ...                   | ...    | ...               | ...    | .28     |
| White                                | 77                    | (51.0) | 48                | (49.0) |         |
| Black                                | 31                    | (20.5) | 14                | (14.3) |         |
| Other                                | 43                    | (28.5) | 36                | (36.7) |         |
| Ethnicity                            | ...                   | ...    | ...               | ...    | 1.00    |
| Hispanic                             | 60                    | (39.7) | 39                | (39.8) |         |
| Non-Hispanic                         | 91                    | (60.3) | 59                | (60.2) |         |
| Education                            | ...                   | ...    | ...               | ...    | .53     |
| ≤12                                  | 65                    | (43.1) | 37                | (37.8) |         |
| 13–15                                | 38                    | (25.2) | 23                | (23.5) |         |
| ≥16                                  | 48                    | (31.8) | 38                | (38.8) |         |
| Marital status                       | ...                   | ...    | ...               | ...    | .82     |
| Single/never married                 | 71                    | (47.0) | 44                | (44.9) |         |
| Married/cohabiting                   | 67                    | (44.4) | 47                | (48.0) |         |
| Divorced/separated/widowed           | 13                    | (8.6)  | 7                 | (7.1)  |         |
| Circumcision status                  | ...                   | ...    | ...               | ...    | .08     |
| Not circumcised                      | 95                    | (66.2) | 54                | (55.1) |         |
| Circumcised                          | 51                    | (33.8) | 44                | (44.9) |         |
| Cigarette smoking status             | ...                   | ...    | ...               | ...    | .56     |
| Current                              | 39                    | (25.8) | 27                | (27.6) |         |
| Former                               | 24                    | (15.9) | 20                | (20.4) |         |
| Never                                | 88                    | (58.3) | 51                | (52.0) |         |
| Baseline tobacco use                 | ...                   | ...    | ...               | ...    | .80     |
| Current                              | 44                    | (29.1) | 30                | (30.6) |         |
| Not current                          | 107                   | (70.9) | 68                | (69.4) |         |
| Alcohol consumption in last month    | ...                   | ...    | ...               | ...    | .25     |
| No alcohol                           | 36                    | (23.8) | 15                | (15.3) |         |
| 1–4 drinks/occasion                  | 51                    | (33.8) | 31                | (31.6) |         |
| ≥5 drinks/occasion                   | 61                    | (40.4) | 48                | (49.0) |         |
| Missing                              | 3                     | (2.0)  | 4                 | (4.1)  |         |
| Lifetime female vaginal sex partners | ...                   | ...    | ...               | ...    | .39     |
| <10                                  | 41                    | (27.2) | 29                | (29.6) |         |
| 10–19                                | 26                    | (17.2) | 22                | (22.5) |         |
| 20–49                                | 50                    | (33.1) | 27                | (27.6) |         |
| ≥50                                  | 30                    | (19.9) | 20                | (20.4) |         |
| Missing                              | 4                     | (2.7)  | 0                 | (0.0)  |         |
| Lifetime male anal sex partners      | ...                   | ...    | ...               | ...    | .70     |
| 0                                    | 115                   | (76.2) | 79                | (80.6) |         |
| 1–9                                  | 20                    | (13.3) | 11                | (11.2) |         |
| ≥10                                  | 16                    | (10.6) | 8                 | (8.2)  |         |
| Sexual orientation                   | ...                   | ...    | ...               | ...    | .55     |
| Never MSM                            | 111                   | (73.5) | 76                | (77.6) |         |
| MSM                                  | 40                    | (26.5) | 22                | (22.5) |         |

Abbreviations: GWs, genital warts; HIM Study, HPV Infection in Men Study; HPV, human papillomavirus; MSM, men having sex with men.

**Table 2. Distribution of HPV-6 Variants Detected in the Most Recent Swab of Normal Genital Skin Prior to Wart Detection, by Case Status, Country, and Age Group**

|                             | Sublineage B1 |      | Sublineage B3 |      | Lineage A<br>Sublineages B2, B5 |      | Total |       | PValue |
|-----------------------------|---------------|------|---------------|------|---------------------------------|------|-------|-------|--------|
|                             | n             | %    | n             | %    | n                               | %    | n     | %     |        |
| Controls (n = 151)          | ...           | ...  | ...           | ...  | ...                             | ...  | ...   | ...   | ...    |
| Country                     | ...           | ...  | ...           | ...  | ...                             | ...  | ...   | ...   | .006   |
| Brazil                      | 21            | 28.4 | 45            | 60.8 | 8                               | 10.8 | 74    | 49.0  | ...    |
| Mexico                      | 3             | 7.5  | 32            | 80.0 | 5                               | 12.5 | 40    | 26.5  | ...    |
| US                          | 16            | 43.2 | 18            | 48.7 | 3                               | 8.1  | 37    | 24.5  | ...    |
| Age Group                   | ...           | ...  | ...           | ...  | ...                             | ...  | ...   | ...   | .09    |
| 18–24                       | 12            | 40.0 | 17            | 56.7 | 1                               | 3.3  | 30    | 19.9  | ...    |
| 25–34                       | 10            | 17.9 | 41            | 73.2 | 5                               | 8.9  | 56    | 37.1  | ...    |
| ≥35                         | 18            | 27.7 | 37            | 56.9 | 10                              | 15.4 | 65    | 43.1  | ...    |
| Total                       | 40            | 26.5 | 95            | 62.9 | 16 <sup>a</sup>                 | 10.6 | 151   | 100.0 | ...    |
| Cases (n = 70) <sup>b</sup> | ...           | ...  | ...           | ...  | ...                             | ...  | ...   | ...   | ...    |
| Country                     | ...           | ...  | ...           | ...  | ...                             | ...  | ...   | ...   | .007   |
| Brazil                      | 13            | 61.9 | 8             | 38.1 | 0                               | 0.0  | 21    | 30.0  | ...    |
| Mexico                      | 4             | 17.4 | 17            | 73.9 | 2                               | 8.7  | 23    | 32.9  | ...    |
| US                          | 14            | 53.9 | 12            | 46.2 | 0                               | 0.0  | 26    | 37.1  | ...    |
| Age group                   | ...           | ...  | ...           | ...  | ...                             | ...  | ...   | ...   | .19    |
| 18–24                       | 11            | 68.8 | 5             | 31.3 | 0                               | 0.0  | 16    | 22.9  | ...    |
| 25–34                       | 9             | 34.6 | 16            | 61.5 | 1                               | 3.9  | 26    | 37.1  | ...    |
| ≥35                         | 11            | 39.3 | 16            | 57.1 | 1                               | 3.6  | 28    | 10.0  | ...    |
| Total                       | 31            | 44.3 | 37            | 52.9 | 2 <sup>c</sup>                  | 2.9  | 70    | 100.0 | ...    |

Abbreviations: BZ, Brazil; EGL, external genital lesion; HPV, human papillomavirus; MX, Mexico; US, United States.

<sup>a</sup>Among controls, lineage A, and sublineages B2 and B5 were detected in 5, 7, and 4 swabs, respectively.

<sup>b</sup>Twenty-eight cases lacked an HPV-6-positive normal genital skin swabs within 640 days prior of EGL detection (US = 9, MX = 6, BZ = 13).

<sup>c</sup>Among cases, lineage A and sublineage B2 variants were detected in 1 case each.

cases, the distribution of HPV-6 variants across countries was significantly different, with HPV-6 B1 variants most commonly detected in Brazil and the United States, and HPV-6 B3 variants more frequently found in Mexico ( $P = .007$ ). For both cases and controls, the distribution of HPV-6 variants among genital swabs was independent of age (Table 2).

We further analyzed the prevalence of HPV-6 variants among all 98 GW biopsy samples included in this study. The distribution of HPV-6 variants in these lesions closely resembled that of

the lesion-preceding genital swabs. Although HPV-6 B3 variants were more prevalent in men from Mexico compared with men from Brazil and the United States, this difference did not reach statistical significance in the biopsies ( $P = .21$ ) (Table 3). However, we observed significant association between age and HPV-6 variants detected on GWs: men aged 18–24 years predominantly presented HPV-6 B1-positive lesions (70.0%), whereas HPV-6 B3 variants were more frequently detected in GWs of older men (>34 years; 54.1%) ( $P = .02$ ).

**Table 3. Distribution of HPV-6 Variants Detected in GW Biopsies, by Country and Age Group**

|           | Sublineage B1 |      | Sublineage B3 |      | Lineage A<br>Sublineages B2, B5 <sup>a</sup> |      | Total |       | PValue |
|-----------|---------------|------|---------------|------|----------------------------------------------|------|-------|-------|--------|
|           | n             | %    | n             | %    | n                                            | %    | n     | %     |        |
| Country   | ...           | ...  | ...           | ...  | ...                                          | ...  | ...   | ...   | .21    |
| Brazil    | 18            | 52.9 | 15            | 44.1 | 1                                            | 2.9  | 34    | 34.7  | ...    |
| Mexico    | 8             | 27.6 | 20            | 69.0 | 1                                            | 3.5  | 29    | 29.6  | ...    |
| US        | 17            | 48.6 | 16            | 45.7 | 2                                            | 5.7  | 35    | 35.7  | ...    |
| Age group | ...           | ...  | ...           | ...  | ...                                          | ...  | ...   | ...   | .02    |
| 18–24     | 14            | 70.0 | 6             | 30.0 | 0                                            | 0.0  | 20    | 20.4  | ...    |
| 25–34     | 16            | 39.0 | 25            | 61.0 | 0                                            | 0.0  | 41    | 41.8  | ...    |
| ≥35       | 13            | 35.1 | 20            | 54.1 | 4                                            | 10.8 | 37    | 37.8  | ...    |
| Total     | 43            | 43.9 | 51            | 52.0 | 4                                            | 4.1  | 98    | 100.0 | ...    |

Abbreviations: GW, genital wart; HPV, human papillomavirus.

<sup>a</sup>Lineage A, and sublineages B2 and B5 were detected in 1, 2 and 1 EGLs, respectively.

**Table 4. Cases With the Same HPV-6 Variant Detected in the EGL and in Normal Genital Skin Swab Collected Prior to GW Development<sup>a</sup>**

| HPV-6 Variant in EGL Biopsy     | Previous Genital Swab With the Same Variant |      | P Value |
|---------------------------------|---------------------------------------------|------|---------|
|                                 | n                                           | %    |         |
| Sublineage B1                   | 25/27                                       | 92.6 | ...     |
| Sublineage B3                   | 34/39                                       | 87.2 | ...     |
| Lineage B/sublineages B2, B5, A | 1/4                                         | 25.0 | ...     |
| Overall                         | 60/70                                       | 85.7 | .01     |

Abbreviations: EGL, external genital lesion; GW, genital wart; HPV, human papillomavirus.

<sup>a</sup>HPV-6 variant detected at any visit (maximum of 4 visits) prior to wart development.

Among genital swabs and GWs biopsies, HPV-6 variants from lineage A or sublineages B2 and B5 were rarely detected. Additionally, no variants from the B4 sublineage were identified. Interestingly, GWs harboring these less frequently detected variants were only detected in men  $\geq 35$  years old.

We next sought to investigate HPV-6 infection progression to wart development among cases that had an HPV-6-positive normal genital skin prior to GW development. Among men who developed an HPV-6 B1-positive GW, 92.6% had a previous swab positive for the same variant. Similarly, 87.2% of men who developed an HPV-6 B3-positive GW had a previous swab positive for the same variant (Table 4). Taken together, our results indicate that men with an HPV-6 B1-positive GW were more likely to have an infection with the same variant detected in a normal genital skin swab collected prior to lesion development compared to those with HPV-6 B3 variants or with less common variants (lineage A and sublineages B2 and B5) ( $P = .01$ ).

Finally, Table 5 shows the risk for GW development by HPV-6 status in the most recent genital swab of cases. We observed a significant association of HPV-6 B1 variants infection with GW development (OR = 1.98, 95% CI = 1.04, 3.80;  $P = .04$ ) compared to HPV-6 B3 variants.

## DISCUSSION

In the present study, we examined the prevalence and natural history of HPV-6 variants during a follow-up period spanning

**Table 5. Unadjusted OR (and respective 95% CI) for the Risk of GW by HPV-6 Variant Status in the Most Recent Genital Swab Collected Prior to Lesion Development<sup>a</sup>**

|                                  | Cases<br>(n = 70) | Controls<br>(n = 151) | Unadjusted OR<br>(95% CI) | P Value |
|----------------------------------|-------------------|-----------------------|---------------------------|---------|
| Sublineage B3                    | 37                | 95                    | 1 (Ref.)                  |         |
| Sublineage B1                    | 31                | 40                    | 1.98 (1.04–3.80)          | .04     |
| Lineage A<br>Sublineages B2, B5, | 2                 | 16                    | 0.32 (0.03–1.48)          | .20     |

Abbreviations: CI, confidence interval; GW, genital wart; HPV, human papillomavirus; OR, odds ratio.

<sup>a</sup>HPV-6 sublineage B3 was selected as the reference (Ref.) group.

about 2 years within a multicentric cohort of men from the United States, Brazil, and Mexico. Molecular variants of HPV-6 were characterized based on the sequence analysis of a 617-bp fragment of the *L2* gene. This fragment is contained within the 960-bp segment shown by Jelen and colleagues [10] to be representative of whole-genome-based phylogenetic clustering, and which contains sufficient single-nucleotide polymorphism patterns to discriminate between major HPV-6 lineages and sublineages. The present study revealed the predominance of HPV-6 B1 and B3 variants with some differences in their distribution by geographic region and case status; specifically, we detected an increase in the frequency of B1 variants in cases compared to controls. We further observed that among cases, most genital HPV-6 swabs preceding GW development contained the same variant present in the lesion. Most notably, we showed for the first time that infections with HPV-6 B1 variants are associated with an increased risk of GW development compared to the most commonly detected HPV-6 B3 variants. To the best of our knowledge, this study is unique in investigating prospectively the impact of HPV-6 intratypic variability in the development of GWs in men.

Several studies have suggested that high-risk HPV-16 and HPV-18 coevolved with the human species and that the distribution of variants of both viral types varies geographically [20–22]. However, with regard to variants of low-risk HPV types, only slight geographical correlations have been reported, which strongly suggest that HPV-6 and HPV-11 variants are detected with similar frequencies around the world [10, 15, 16, 23]. In the present study, HPV-6 B3 variants predominated in all 3 countries among genital swabs of controls, although these variants were significantly less frequent in men from Brazil and the United States compared to men from Mexico. Interestingly, the prevalence of HPV-6 B1 variants was higher in GW biopsies of cases and in normal genital skin swabs from cases compared to controls from all 3 countries. Moreover, among men from Brazil and the United States who developed a GW, HPV-6 B1 variants were more prevalent than HPV-6 B3. Our results corroborate previous data reporting that worldwide (including samples from Brazil and the United States), the majority of HPV-6 variants in GWs and laryngeal papillomas cluster into the B1 sublineage, with the B3 sublineage being the second most frequently detected [10, 11, 12, 16, 24]. The low prevalence, or even absence, of HPV-6 A, B2, or B4 variants in GWs in the United States and Brazil has also been observed by others [10]. It is of note that most studies conducted to date were restricted to lesion specimens with very scarce data, focusing on preceding normal skin genital swabs.

To date, the HIM Study is the most extensive analysis of the natural history of HPV infection in healthy and asymptomatic men aged 18 years and older and mostly men who have sex with women. Overall, genital HPV prevalence among HIM participants at baseline was 65.2% of which about one-third are

low-risk viral types [17, 25]; HPV-6 was the third most common viral type in genital smears of these men and was identified in 9.4%, 4.1%, and 6.3% of men from Brazil, Mexico, and the United States, respectively. It was further observed that after 24 months of follow-up, 27% of genital HPV-6 infections progressed to an HPV-6-positive condyloma (median time of 7.8 months) [26]. Although younger men (<30 years) enrolled in the HIM Study cohort were more likely to develop any EGL [26], among HPV-6-positive men included in the present analysis, we did not detect any significant association between age and the development of GWs.

We observed that the great majority of HPV-6 variants detected in GWs were previously detected in normal genital skin swabs collected up to 640 days prior to lesion development, suggesting that persistence (even if short-term persistence) of HPV-6 infection precedes lesion development in most cases, even if significant differences were observed among variants. Among cases, 28 men included in this study did not have an HPV-6-positive swab prior to GW development; this could be due to the fact that in the HIM protocol design, we tested for genital HPV infection every 6 months, and it is likely that some infections progressed to GWs during the short time frame between study visits. Additionally, it is possible that latent and/or persistent infection remained subclinical, likely at low-copy number and thus undetectable. This hypothesis is reinforced by the observed recurrence of laryngeal papillomas and genital warts as a consequence of long-term persistence of unique HPV genomic variant rather than of repeated reinfections with novel HPV isolates [13, 27].

It is well established, at least for populations with a multi-ethnic composition, that HPV-16 Asian-American variants are associated with an increased risk of clinically relevant anogenital lesions development [28–30]. We report here for the first time that HPV-6 B1 variants are associated with 2-fold increased risk of GW development when compared to B3 variants in this cohort of men from 3 different countries. At the same time, in other reports, the association of clinical correlates to specific HPV-6 variants was not observed [15, 16, 31].

Functionally, for high-risk HPV-16, it has been extensively described in literature that Asian-American variants have the increased ability of inducing differentiation-resistant colonies of human foreskin keratinocytes [32, 33] and in cooperative transformation involving other signaling pathways [34, 35]. Conversely, there are no data available regarding whether the E6 and E7 proteins from different HPV-6 variants differ in their biological and biochemical properties. We recently demonstrated, using luciferase reporter assays, that the HPV-6 B1 reference variant is 10 times more transcriptionally active than the HPV-6 B3 reference genome [31]. The more efficient E1/E2 expression could confer an elevated viral replication potential to HPV-6 B1 variants; thus, one may assume that an infection with a more replicative viral variant could

implicate more efficient proliferation and higher frequency of GW development.

In summary, we present for the first time the impact of HPV-6 nucleotide variability on GW development in the male genitalia. Our results provide the background for the need of future efforts on elucidating the influence of intraviral heterogeneity on the clinical outcome of HPV-6 infection and the mechanisms by which B1 variants endow a higher risk of progression to clinically relevant lesions.

## Notes

**Acknowledgements.** The authors thank the HIM Study teams in the United States (Huiyi Lin, Jane Messina, Christine Pierce Campbell, Bradley Sirak, Christine Gage, Donna J. Ingles, Kim Isaacs, Kayoko Kennedy, Andrea Bobanic, Shams Rahman, Matthew Schabath, Alan Nyitray, and Julie Rathwell); Brazil (Ricardo Cintra, Filomena Cernicchiaro, Graça Ribeiro, Rosária Otero, Roberta Bocalon, Juliana Antunes, Fernanda Silva, Rossana Terreri, and the CRT-DST/AIDS nursing team); and Mexico (Aurelio Cruz Valdez, René de Jesús Alvear Vásquez, Oscar Rojas Juárez, Rossana del Carmen González Sosa, Rosangel Ríos Vences, Martha Huerta Segura, Alicia Rodríguez Galván, Paula Román Rodríguez, Ana Laura Landa Vélez, Griselda Díaz García, Verónica Chávez Abarca, Gisela Flores Quevedo, María del Pilar Hernández Nevárez, Guillermina Sánchez Martínez, Adriana Ortiz Rojas, and Carlos Omar Barrera Flores).

**Financial support.** This work was supported by the Ludwig Institute for Cancer Research (to L. L. V.); Fundação de Amparo à Pesquisa do Estado de São Paulo (FAPESP; grant no. 08/57889-1 to L. L. V.); Conselho Nacional de Desenvolvimento Científico e Tecnológico (CNPq; grant no. 573799/2008-3 to L. L. V.); and Comissão de Aperfeiçoamento de Pessoal do Nível Superior (Capes; to E. F. D.). The infrastructure of the HIM Study cohort was supported through a grant from the National Cancer Institute (NCI), National Institutes of Health (NIH; grant no. R01 CA098803 to A. R. G.).

**Potential conflicts of interest.** A. R. G. (IISP39582; IISP53280) is a current recipient of grant funding from Merck. A. R. G. and L. L. V. are members of the Merck Advisory Board for HPV prophylactic vaccines. All other authors report no potential conflicts. All authors have submitted the ICMJE Form for Disclosure of Potential Conflicts of Interest. Conflicts that the editors consider relevant to the content of the manuscript have been disclosed.

## References

1. Wolf R, Davidovici B. Treatment of genital warts: facts and controversies. *Clin Dermatol* **2010**; 28:546–8.
2. Steben M, Garland SM. Genital warts. *Best Pract Res Clin Obstet Gynaecol* **2014**; 28:1063–73.
3. Bouvard V, Baan R, Straif K, et al.; WHO International Agency for Research on Cancer Monograph Working Group. A review of human carcinogens—Part B: biological agents. *Lancet Oncol* **2009**; 10:321–2.
4. Bzhalava D, Guan P, Franceschi S, Dillner J, Clifford G. A systematic review of the prevalence of mucosal and cutaneous human papillomavirus types. *Virology* **2013**; 445:224–31.
5. Villa LL, Costa RL, Petta CA, et al. Prophylactic quadrivalent human papillomavirus (types 6, 11, 16, and 18) L1 virus-like particle vaccine in young women: a randomised double-blind placebo-controlled multicentre phase II efficacy trial. *Lancet Oncol* **2005**; 6:271–8.
6. Read TR, Hocking JS, Chen MY, Donovan B, Bradshaw CS, Fairley CK. The near disappearance of genital warts in young women 4 years after commencing a national human papillomavirus (HPV) vaccination programme. *Sex Transm Infect* **2011**; 87:544–7.
7. de Villiers EM, Gissmann L, zur Hausen H. Molecular cloning of viral DNA from human genital warts. *J Virol* **1981**; 40:932–5.
8. Rando RF, Sedlacek TV, Hunt J, Jenson AB, Kurman RJ, Lancaster WD. Verrucous carcinoma of the vulva associated with an unusual type 6 human papillomavirus. *Obstet Gynecol* **1986**; 67:70–5.
9. Burk RD, Chen Z, Harari A, et al. Classification and nomenclature system for human Alphapapillomavirus variants: general features, nucleotide landmarks and

- assignment of HPV6 and HPV11 isolates to variant lineages. *Acta Dermatovenerol Alp Pannonica Adriat* **2011**; 20:113–23.
10. Jelen MM, Chen Z, Kocjan BJ, et al. Global genomic diversity of human papillomavirus 6 based on 724 isolates and 190 complete genome sequences. *J Virol* **2014**; 88:7307–16.
  11. Danielewski JA, Garland SM, McCloskey J, Hillman RJ, Tabrizi SN. Human papillomavirus type 6 and 11 genetic variants found in 71 oral and anogenital epithelial samples from Australia. *PLOS One* **2013**; 8:e63892.
  12. Kocjan BJ, Jelen MM, Maver PJ, Seme K, Poljak M. Pre-vaccination genomic diversity of human papillomavirus genotype 6 (HPV 6): a comparative analysis of 21 full-length genome sequences. *Infect Genet Evol* **2011**; 11:1805–10.
  13. Komloš KF, Kocjan BJ, Košorok P, et al. Tumor-specific and gender-specific pre-vaccination distribution of human papillomavirus types 6 and 11 in anogenital warts and laryngeal papillomas: a study on 574 tissue specimens. *J Med Virol* **2012**; 84:1233–41.
  14. Combrinck CE, Seedat RY, Randall C, Roodt Y, Burt FJ. Novel HPV-6 variants of human papillomavirus causing recurrent respiratory papillomatosis in southern Africa. *Epidemiol Infect* **2012**; 140:1095–101.
  15. Heinzel PA, Chan SY, Ho L, et al. Variation of human papillomavirus type 6 (HPV-6) and HPV-11 genomes sampled throughout the world. *J Clin Microbiol* **1995**; 33:1746–54.
  16. de Matos RP, Sichero L, Mansur IM, et al. Nucleotide and phylogenetic analysis of human papillomavirus types 6 and 11 isolated from recurrent respiratory papillomatosis in Brazil. *Infect Genet Evol* **2013**; 16:282–9.
  17. Giuliano AR, Lazcano-Ponce E, Villa LL, et al. The human papillomavirus infection in men study: human papillomavirus prevalence and type distribution among men residing in Brazil, Mexico, and the United States. *Cancer Epidemiol Biomarkers Prev* **2008**; 17:2036–43.
  18. Ingles DJ, Pierce Campbell CM, Messina JA, et al. Human papillomavirus virus (HPV) genotype- and age-specific analyses of external genital lesions among men in the HPV Infection in Men (HIM) Study. *J Infect Dis* **2015**; 211:1060–7.
  19. Anic GM, Messina JL, Stoler MH, et al. Concordance of human papillomavirus types detected on the surface and in the tissue of genital lesions in men. *J Med Virol* **2013**; 85:1561–6.
  20. Sichero L, Villa LL. Epidemiological and functional implications of molecular variants of human papillomavirus. *Braz J Med Biol Res* **2006**; 39:707–17.
  21. Ho L, Chan SY, Burk RD, et al. The genetic drift of human papillomavirus type 16 is a means of reconstructing prehistoric viral spread and the movement of ancient human populations. *J Virol* **1993**; 67:6413–23.
  22. Smith B, Chen Z, Reimers L, et al. Sequence imputation of HPV16 genomes for genetic association studies. *PLOS One* **2011**; 6:e21375.
  23. Jelen MM, Chen Z, Kocjan BJ, et al. Global genomic diversity of human papillomavirus 11 based on 433 isolates and 78 complete genome sequences. *J Virol* **2016**; 90:5503–13.
  24. Kocjan BJ, Poljak M, Cimerman M, et al. Pre-vaccination genomic diversity of human papillomavirus genotype 6 (HPV 6). *Virology* **2009**; 391:274–83.
  25. Giuliano AR, Lee JH, Fulp W, et al. Incidence and clearance of genital human papillomavirus infection in men (HIM): a cohort study. *Lancet* **2011**; 377:932–40.
  26. Sudenga SL, Ingles DJ, Pierce Campbell CM, et al. Genital human papillomavirus infection progression to external genital lesions: the HIM study. *Eur Urol* **2016**; 69:166–73.
  27. Kocjan BJ, Gale N, Hočevcar Boltežar I, et al. Identical human papillomavirus (HPV) genomic variants persist in recurrent respiratory papillomatosis for up to 22 years. *J Infect Dis* **2013**; 207:583–7.
  28. Mirabello L, Yeager M, Cullen M, et al. HPV16 sublineage associations with histology-specific cancer risk using HPV whole-genome sequences in 3200 women. *J Natl Cancer Inst* **2016**; 108:djw100.
  29. Sichero L, Ferreira S, Trottier H, et al. High grade cervical lesions are caused preferentially by non-European variants of HPVs 16 and 18. *Int J Cancer* **2007**; 120:1763–8.
  30. Xi LF, Carter JJ, Galloway DA, et al. Acquisition and natural history of human papillomavirus type 16 variant infection among a cohort of female university students. *Cancer Epidemiol Biomarkers Prev* **2002**; 11:343–51.
  31. Measso do Bonfim C, Simão Sobrinho J, Lacerda Nogueira R, et al. Differences in transcriptional activity of human papillomavirus type 6 molecular variants in recurrent respiratory papillomatosis. *PLOS One* **2015**; 10:e0132325.
  32. Niccoli S, Abraham S, Richard C, Zehbe I. The Asian-American E6 variant protein of human papillomavirus 16 alone is sufficient to promote immortalization, transformation, and migration of primary human foreskin keratinocytes. *J Virol* **2012**; 86:12384–96.
  33. Richard C, Lanner C, Naryzhny SN, et al. The immortalizing and transforming ability of two common human papillomavirus 16 E6 variants with different prevalences in cervical cancer. *Oncogene* **2010**; 29:3435–45.
  34. Hochmann J, Sobrinho JS, Villa LL, Sichero L. The Asian-American variant of human papillomavirus type 16 exhibits higher activation of MAPK and PI3K/AKT signaling pathways, transformation, migration and invasion of primary human keratinocytes. *Virology* **2016**; 492:145–54.
  35. Sichero L, Sobrinho JS, Villa LL. Oncogenic potential diverge among human papillomavirus type 16 natural variants. *Virology* **2012**; 432:127–32.
